# Supplementary material
Source: PubMed Central journal article supplement (PMC6248888)
Supplement: NIHMS997063-supplement-Supp_info.pdf [file NIHMS997063-supplement-Supp_info.pdf]

Supplemental data

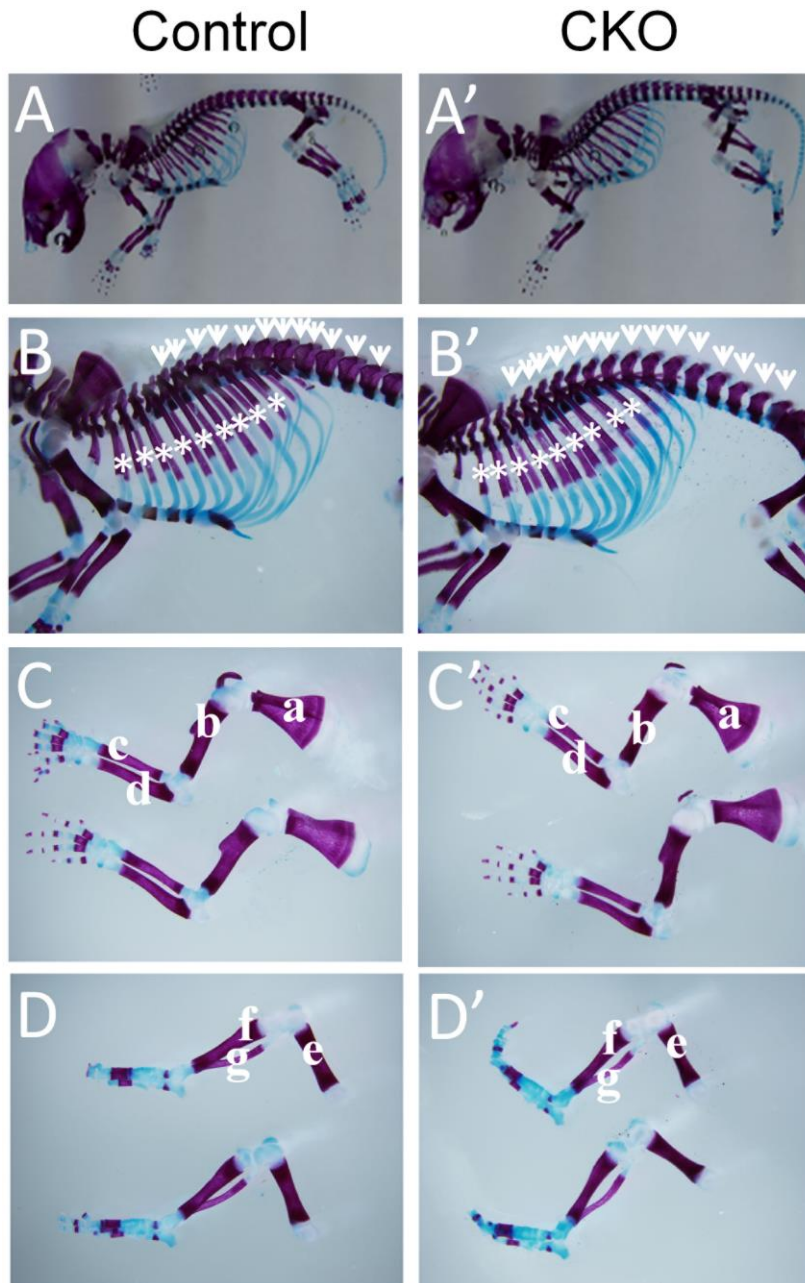

**Figure S1. TSC1 deletion by Osx-Cre does not affect embryonic skeleton development.** Skeleton preparation of *Tsc1*<sup>F/F</sup> (Control) (A-D) and *Tsc1*<sup>F/F</sup>;Osx-Cre (CKO) (A'-D') mice at birth. (A, A') Overall staining. (B, B') Thoracic cage (arrow heads point to vertebrae and \* indicates rib). (C, C') Arm (a: scapula, b: humerus c: radius d: ulna). (D, D') Leg (e: femur, f: tibia, g: fibula).

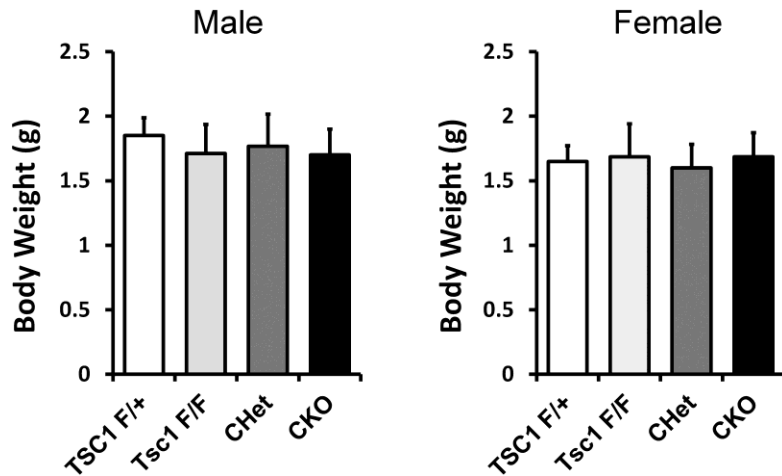

**Figure S2. *Tsc1* deletion by *Osx*-Cre did not affect body weight in neonatal mice.** Body weight of *Tsc1*<sup>F/+</sup>, *Tsc1*<sup>F/F</sup>, *Tsc1*<sup>F/+</sup>;Osx-Cre (CHet) and *Tsc1*<sup>F/F</sup>;Osx-Cre (CKO) mice at one-day old. n=6 for *Tsc1*<sup>F/+</sup>, n=8 for *Tsc1*<sup>F/F</sup>, n=6 for CHet, and n=8 for CKO male mice. n=6 for *Tsc1*<sup>F/+</sup>, n=7 for *Tsc1*<sup>F/F</sup>, n=4 for CHet, and n=7 for CKO female mice. Data were presented as mean + SE.

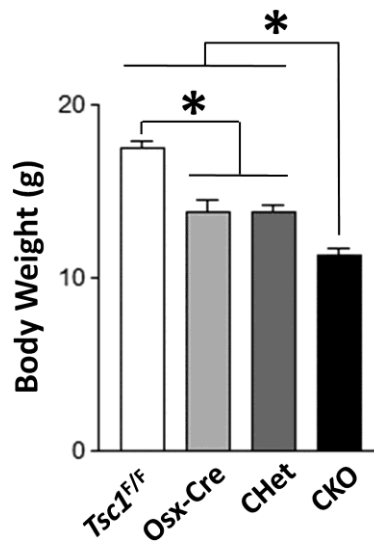

**Figure S3. *Tsc1* deletion by *Osx*-Cre leads to decreased body weight at one month old.** Body weight of *Tsc1*<sup>F/F</sup>, Osx-Cre, *Tsc1*<sup>F/+</sup>;Osx-Cre (CHet) and *Tsc1*<sup>F/F</sup>;Osx-Cre (CKO) male mice at one month old. n=41 for *Tsc1*<sup>F/F</sup>, n=13 for Osx-Cre, n=43 for CHet, and n=45 for CKO mice. Data were presented as mean + SE. \* p<0.05

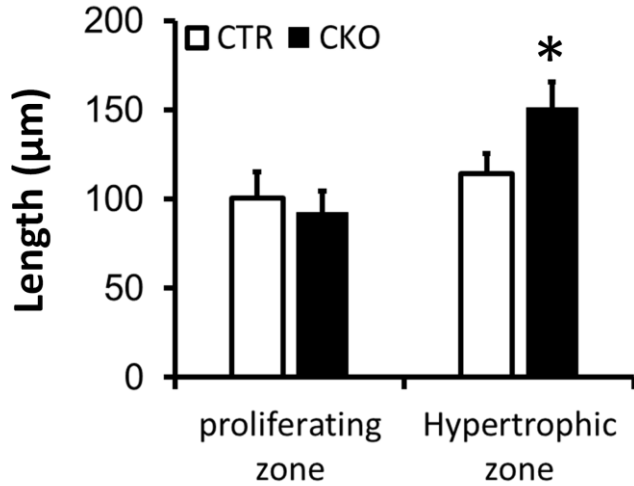

**Figure S4. *Tsc1* deletion by *Osx*-Cre leads to increased length of hypertrophic zone in femoral growth plate. \* $p < 0.05$ ,  $n = 5$ . Values were presented as mean + SE.**

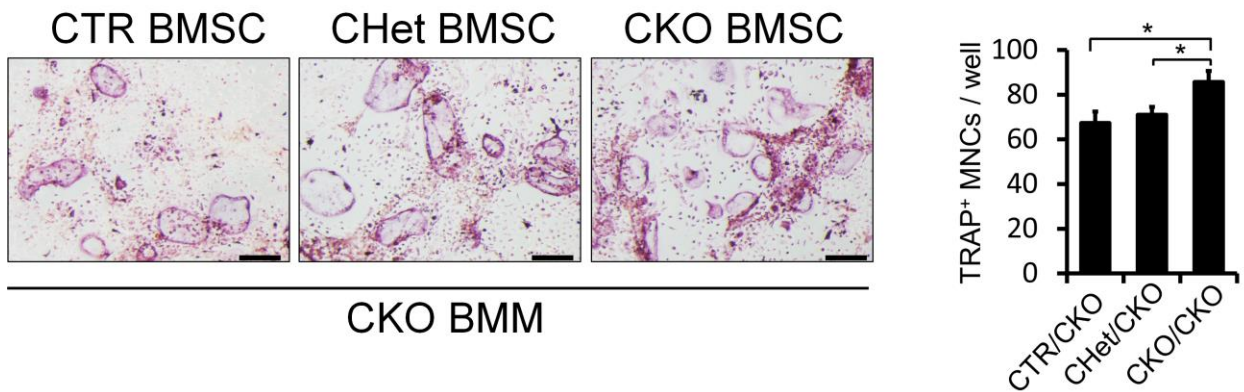

**Figure S5. *TSC1*-deficient BMSCs supports osteoclastogenesis**

50,000 Bone marrow derived macrophages (BMMs) isolated from CKO mice were cultured with 10,000 BMSCs isolated from CTR, CHet and CKO mice in the presence of 20 nM  $1\alpha, 25$ -dihydroxy vitamin  $D_3$  (Sigma) and 1  $\mu$ M prostaglandin E2 for 7 days. Numbers of TRAP-positive (TRAP<sup>+</sup>) multinucleated cells (MNC) (>3 nuclei) were counted (right panel). Scale bar=100 $\mu$ m. \* $p < 0.05$ ,  $n = 3$ . Values were presented as mean + SE.

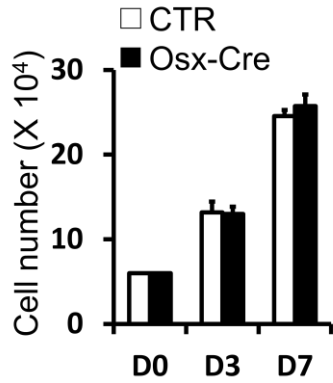

**Fig S6. Osx-Cre does not affect BMSC proliferation.**

BMSCs were isolated from femur as described in Materials and Methods. Cell numbers were counted at indicated time points.  $n = 3$ .

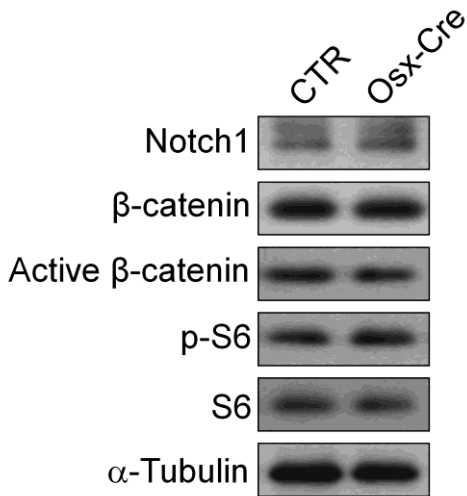

**Fig S7. Osx-Cre does not affect  $\beta$ -catenin and Notch 1 level in BMSCs.**

BMSCs were isolated from long bones and analyzed by western blotting with indicated antibodies.

## Supplemental Table S1

Primer sequences used for qPCR.

|                                | Sense (5'-3')            | Antisense (5'-3')         |
|--------------------------------|--------------------------|---------------------------|
| <i>Alpl</i>                    | GGACAGGACACACACACACA     | CAAACAGGAGAGCCACTTCA      |
| <i>Bsp</i>                     | ACAATCCGTGCCACTCACT      | TTTCATCGAGAAAGCACAGG      |
| <i>Col1a1</i>                  | GAGCCTGAGTCAGCAGATTG     | CCAGTACTCTCCGCTCTTCC      |
| <i>Ocn</i>                     | TGAGCTTAACCCTGCTTGTG     | TAGGGCAGCACAGGTCCTA       |
| <i>Runx2</i>                   | AGGGACTATGGCGTCAAACA     | GGCTCACGTCGCTCATCTT       |
| <i>Osx</i>                     | GGTCCCCAGCTCGAGGAT       | CTAGAGCCGCCAAATTTGCT      |
| <i>Opg</i>                     | TGTGTGTCCCTTGCCCTGACCA   | ACACTCGGTTGTGGGTGCGG      |
| <i>Rankl</i>                   | CAGCATCGCTCTGTTCCTGTA    | CTGCGTTTTTCATGGAGTCTCA    |
| <i>Mcsf</i>                    | CCCACATCCCTGAGTCTGTC     | GTTCCACCTGTCTGTCCTCA      |
| <i>Pparg</i>                   | GTGCCAGTTTCGATCCGTAGA    | GGCCAGCATCGTGTAGATGA      |
| <i>Fabp4</i>                   | ACACCGAGATTTCTTCAAACCTG  | CCATCTAGGGTTATGATGCTCTTCA |
| <i>Adipoq</i>                  | GCACTGGCAAGTTCTACTGCAA   | GTAGGTGAAGAGAACGGCCTTGT   |
| <i>Cebp<math>\alpha</math></i> | CAAGAACAGCAACGAGTACCG    | GTCACTGGTCAACTCCAGCAC     |
| <i>Cebp<math>\beta</math></i>  | ACGACTTCCTCTCCGACCTCT    | CGAGGCTCACGTAACCGTAGT     |
| <i>Zfp423</i>                  | GGTCAGGCTTGATGTCAATGG    | TCAGCACTCTCGAACTTCACG     |
| <i>Axin2</i>                   | CTGCTGACTTAAGAGAGACCAAG  | GAAAGTCCGGAAG AGGTATG     |
| <i>Cnx43</i>                   | TGGGGGAAAGGCGTGAGGGA     | ACCCATGTCTGGGCACCTCTCTT   |
| <i>Lef1</i>                    | TCTCAAGGACAGCAAAGCTC     | CACTTGAGGCTTCATGCACAT     |
| <i>Hey1</i>                    | GAGAAGCAGGGATCTGCTAA     | CCCAAACCTCCGATAGTCCAT     |
| <i>Jagged1</i>                 | AGAAGTCAGAGTTCAGAGGCGTCC | AGTAGAAGGCTGTCACCAAGCAAC  |
| <i>18s</i>                     | GTAACCCGTTGAACCCCAT      | CCATCCAATCGGTAGTAGCG      |
